# Supplementary material for: Physiography, foraging mobility, and the first peopling of Sahul
Source: PubMed Central journal article supplement (PMC11039755; doi:10.1038/s41467-024-47662-1), 2024-04-23
Supplement: 41467_2024_47662_MOESM1_ESM.pdf [file 41467_2024_47662_MOESM1_ESM.pdf]

## SUPPLEMENTARY INFORMATION

### Physiography, foraging mobility, and the first peopling of Sahul

Tristan Salles<sup>1\*</sup>, Renaud Joannes-Boyau<sup>2</sup>, Ian Moffat<sup>2,3</sup>, Laurent Husson<sup>4</sup> and Manon Lorcery<sup>1,4</sup>

<sup>1</sup>School of Geosciences, The University of Sydney, Sydney, Australia

<sup>2</sup>Geoarchaeology and Archaeometry Research Group, Southern Cross University, Lismore, Australia

<sup>3</sup>Archaeology, College of Humanities, Arts and Social Sciences, Flinders University, Adelaide, Australia

<sup>4</sup>ISTerre, CNRS, Université Grenoble-Alpes, Grenoble, France

*\*corresponding authors: TS: [tristan.salles@sydney.edu.au](mailto:tristan.salles@sydney.edu.au)*

### INDEX

**Supplementary Figure 1.** Predicted landscape evolution at 35 ka.

**Supplementary Figure 2.** Physiographic variables used to evaluate resistance to movement at 65 ka.

**Supplementary Figure 3.** Examples of physiographic resistance to movement for the entire Sahul landmass.

**Supplementary Figure 4.** Examples of migration pathways from two mechanistic simulations with different entry points.

**Supplementary Figure 5.** Evaluation of human migration and likelihood of occupation from mechanistic movement simulation.

**Supplementary Figure 6.** Probability of Lévy walkers' presence over modern-day Australia.

**Supplementary Figure 7.** Regional morphological changes around identified sites with predicted archaeological potential.

**Supplementary Table 1.** List of archaeological sites.

**Supplementary Table 2.** Hierarchical classification values.

**Supplementary Table 3.** Archaeological locations (coordinates and names).

**Supplementary Table 4.** Coordinates and regional morphological context of predicted sites.

**Supplementary References**

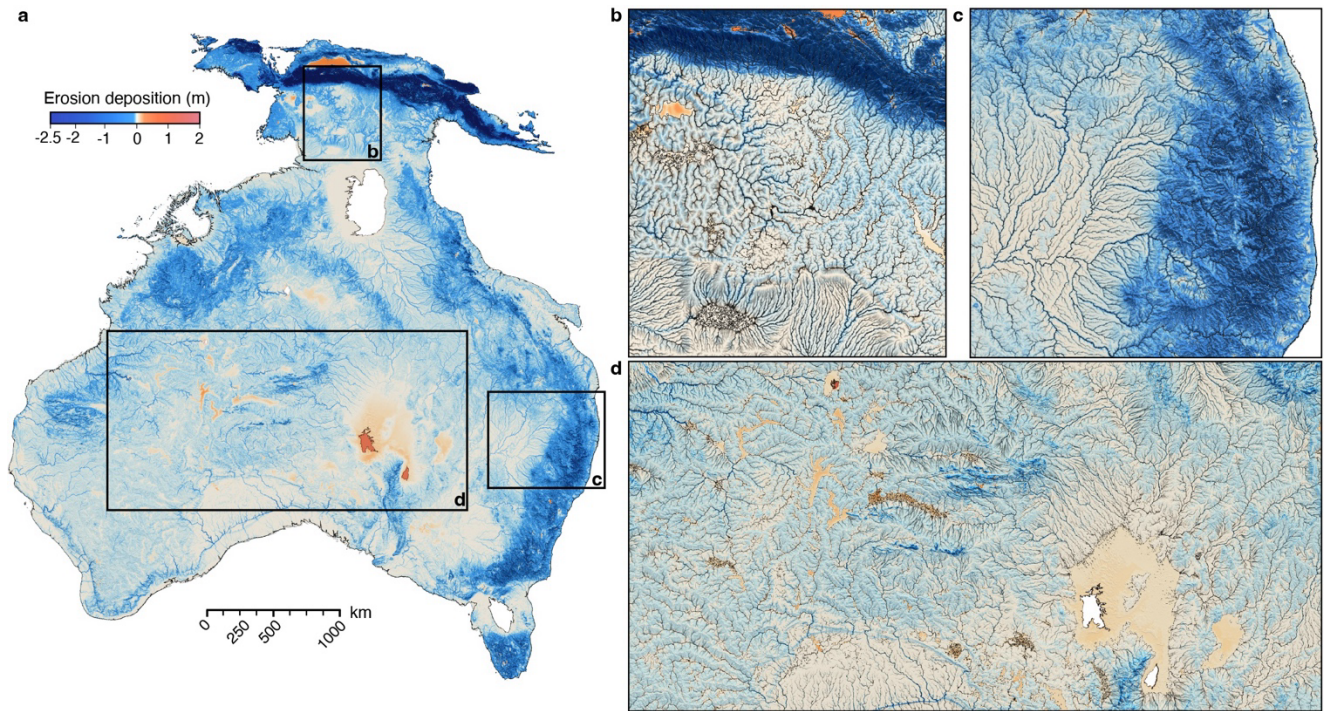

**Supplementary Figure 1. Predicted landscape evolution at 35 ka.** a. Simulated cumulative erosion (blue) and deposition (red) in meters induced by riverine and hillslope processes, highlighting differential erosion across mountain ranges (e.g., New Guinea & Great Australian Escarpment) and sediment accumulation in endorheic basins, lakes, and alluvial plains. Zooms over selected regions (b, c, and d) defined in a and overlaid with drainage patterns from main river systems predicted by the multiple flow direction algorithm. Panels show the results from goSPL software and are visualised with the open-source Paraview software (<https://www.paraview.org>).

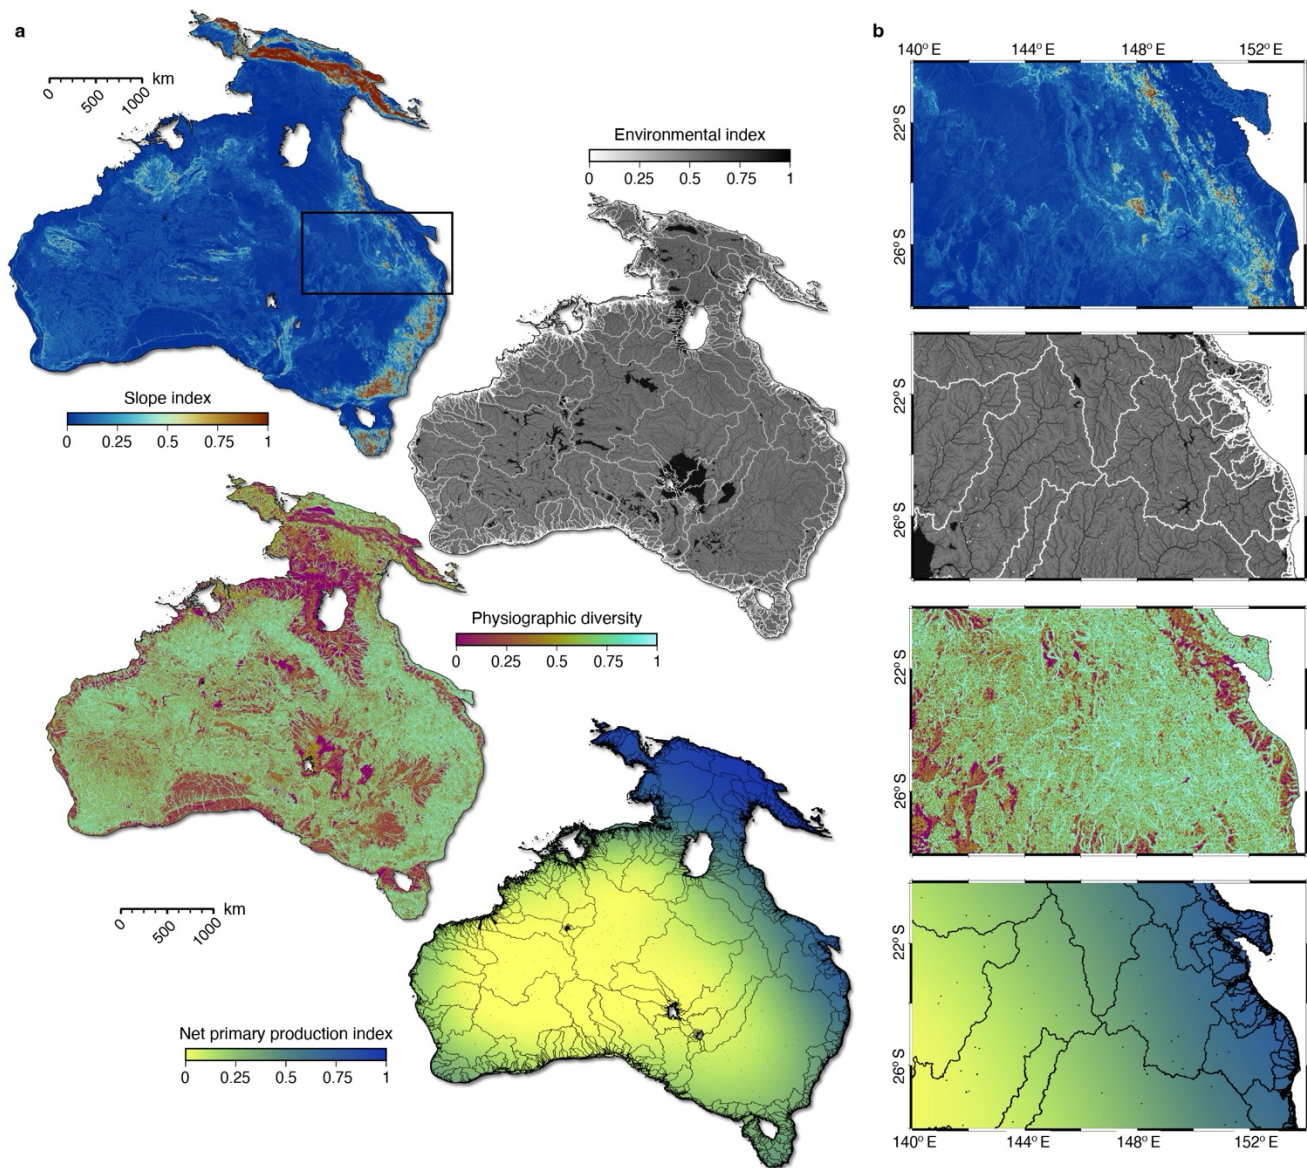

**Supplementary Figure 2. Physiographic variables used to evaluate resistance to movement at 65 ka. a.** Normalized Sahul relief based on mean slopes for the continental region computed over the 2 km grid (top panel). The environmental index (second panel) accounts for lakes, rivers, and arid regions (e.g., central Australia). Values close to 1 will act as barriers and impede movement across the region. The river-related component of the index varies with the simulated water flux. Overlaid white lines represent predicted main drainage divides. Third panel shows the physiographic diversity index from which the landscape complexity (Shannon index) is derived. Bottom panel presents the net primary production index at 65 ka based on LOVECLIM Earth system model<sup>1,2</sup>. **b.** Local distribution of the above variables from a region in Eastern Australia (black rectangle – defined in the top panel of a). All data are available under Creative Commons Attribution 4.0 International Licence (<http://creativecommons.org/licenses/>). The open-source python interface for the Generic Mapping Tools (<https://www.pygmt.org>) is used for visualization.

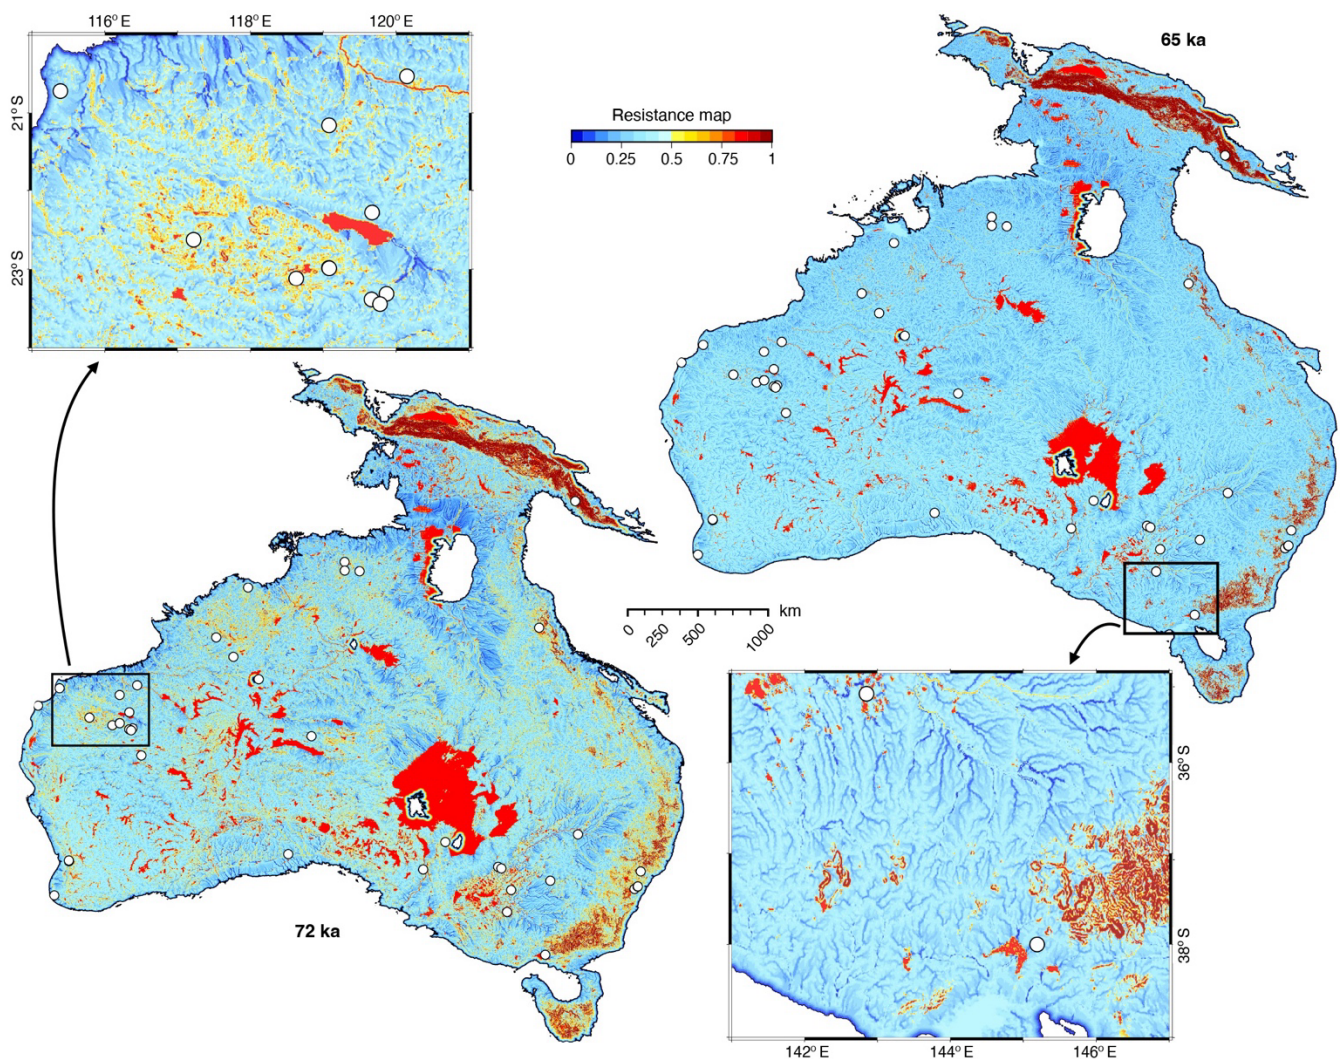

**Supplementary Figure 3. Examples of physiographic resistance to movement for the entire Sahul landmass.** Normalized cost map on the left corresponds to the driest period at  $\sim 72$  ka, with a coastline at  $-49$  m isobath<sup>3</sup>. The one at  $\sim 65$  ka, on the right, combines a wetter period with a low sea-level position (coastline at  $-85$  m isobath<sup>3</sup>). These maps are defined from topographic slopes, environmental factors (rivers, lakes, and deserts), net primary production, and landscape complexity. The cost quantifies the local resistance of the landscape to displacement (cost values increase with resistance). Low cost areas are also added along coastal regions up to 50 km inland. The positions of the archaeological sites older than 35 ka<sup>4</sup> are represented with white circles. Focus on two regions located in the Pilbara (top left) and in the southern Murray-Darling Basin (bottom right). The open-source python interface for the Generic Mapping Tools (<https://www.pygmt.org>) is used for visualization.

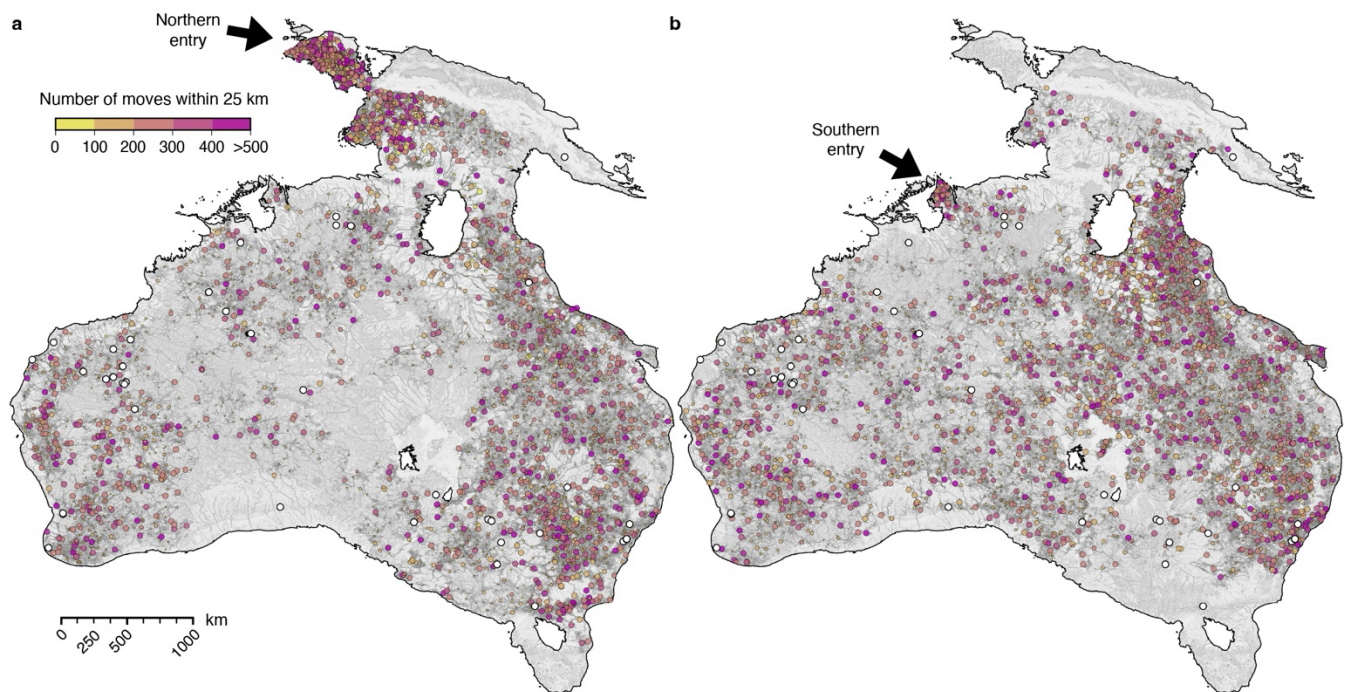

**Supplementary Figure 4. Examples of migration pathways from two mechanistic simulations with different entry points.** Lévy walk simulations of human migration across Sahul using the mechanistic spatially explicit simulation SiMRiv<sup>5</sup>. Two scenarios are presented, one with an entry point in northwest Papua from the Bird's Head Peninsula<sup>6,7,8</sup> (a) and the other one with an entry point in the Kimberley region of Western Australia<sup>9</sup> (b). Both simulations predict migrations routes passing through 39 of the 40 archaeological sites (Supplementary Tab. 1). Colours represent the number of walker moves between consecutive circles and the size of the circle is scaled based on the cumulative distance travelled by walkers for each 25 km segment. Generated paths using the SimRiv software and visualised with the open-source python interface for the Generic Mapping Tools (<https://www.pygmt.org>).

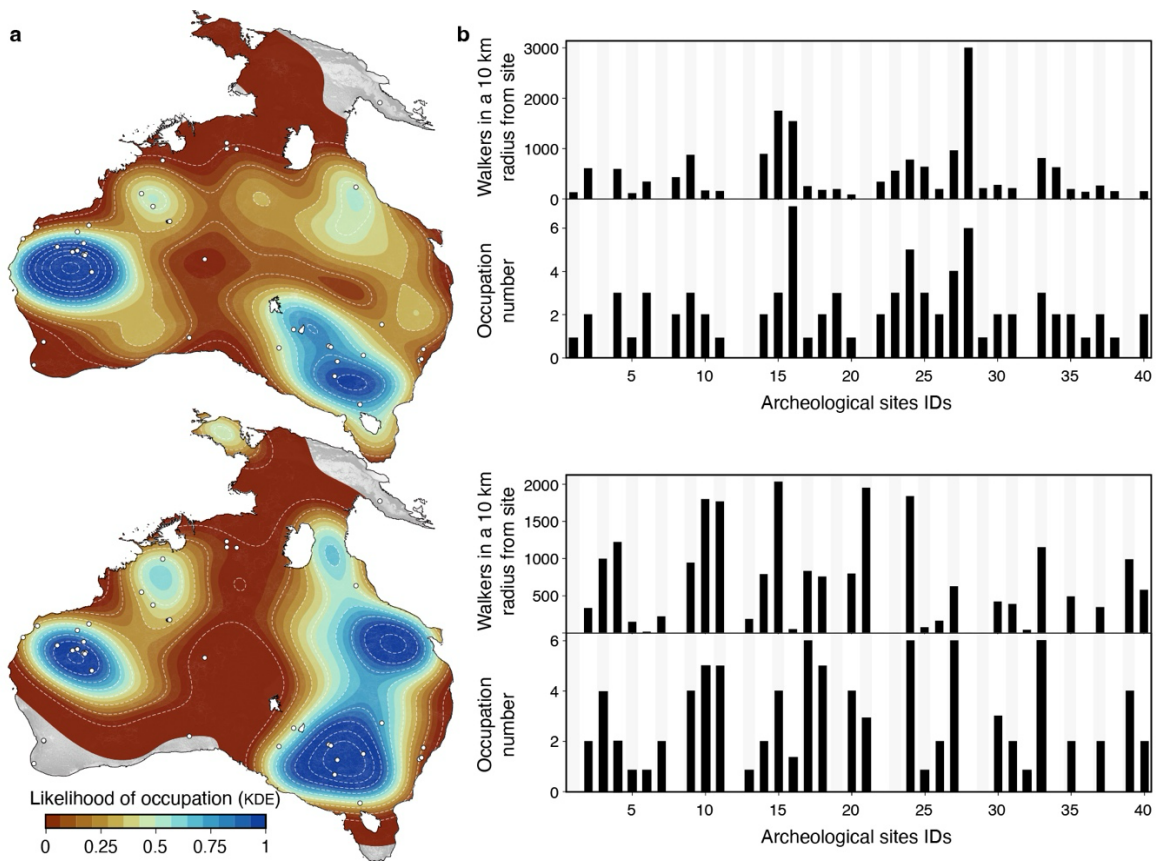

**Supplementary Figure 5. Evaluation of human migration and likelihood of occupation from mechanistic movement simulation.** **a.** Statistical analysis of peopling of Sahul using kernel density estimation based on simulated pathways for two realisations using the northern entry point. **b.** The number of walkers reaching archaeological sites within a 10 km radius (Supplementary Tab. 1) is presented on top panels for each simulation. In the bottom panels, distinct visits to considered sites (e.g., occupation number) are obtained from clustering based on cumulative travelled distance. For the 40 archaeological sites, the sampling size  $n$  is obtained from the 10 million walker steps aggregated assuming a 10 km radius of knowledge. Maps are produced with the open-source python interface for the Generic Mapping Tools (<https://www.pygmt.org>) based on paths generated with SimRiv software.

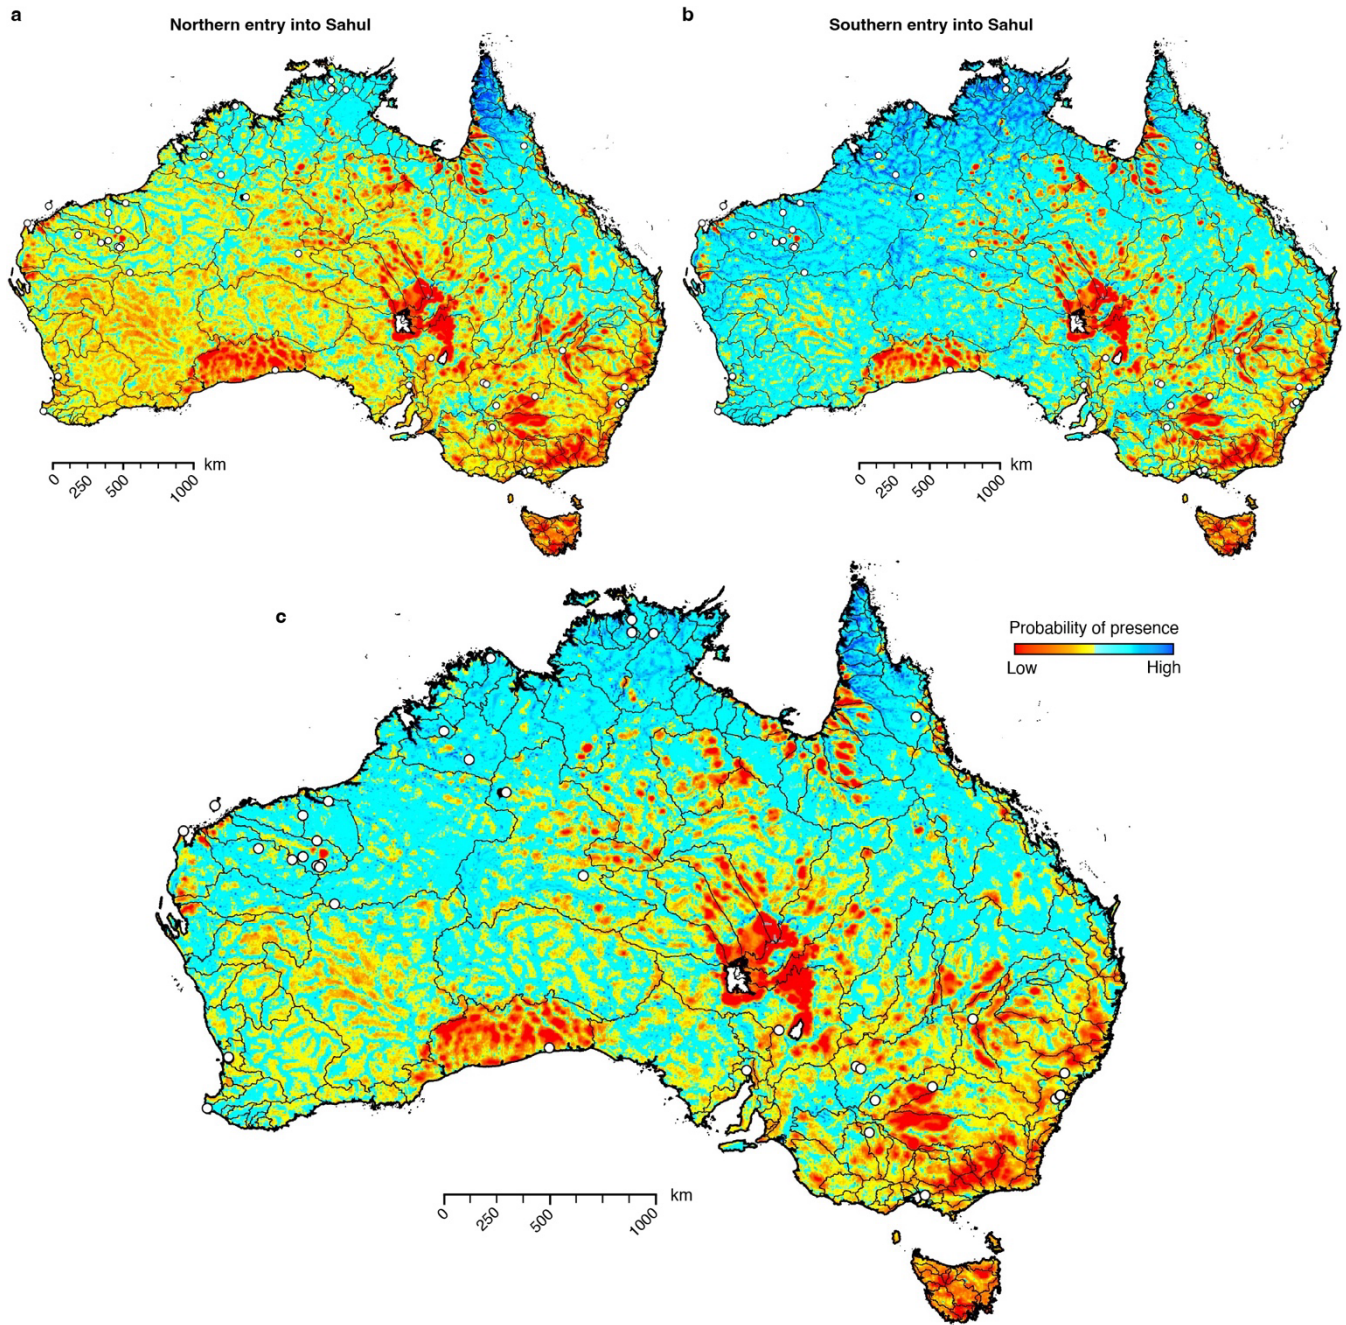

**Supplementary Figure 6. Probability of Lévy walkers' presence over modern-day Australia.** Heat map of aggregated walkers' number into  $0.05^\circ$  cells clipped to Australia considering the northwest Papua entry point<sup>6,7,8</sup> (a), the Kimberley region<sup>9</sup> (Western Australia – b, southern entry) and when combining both routes (c). Cyan to blue areas correspond to regions with high probability of presence and red to yellow areas are regions which are never or rarely chosen. White circles indicate locations of archaeological sites (Supplementary Tab. 1). Maps are produced with the open-source python interface for the Generic Mapping Tools (<https://www.pygmt.org>) based on paths generated with SimRiv software.

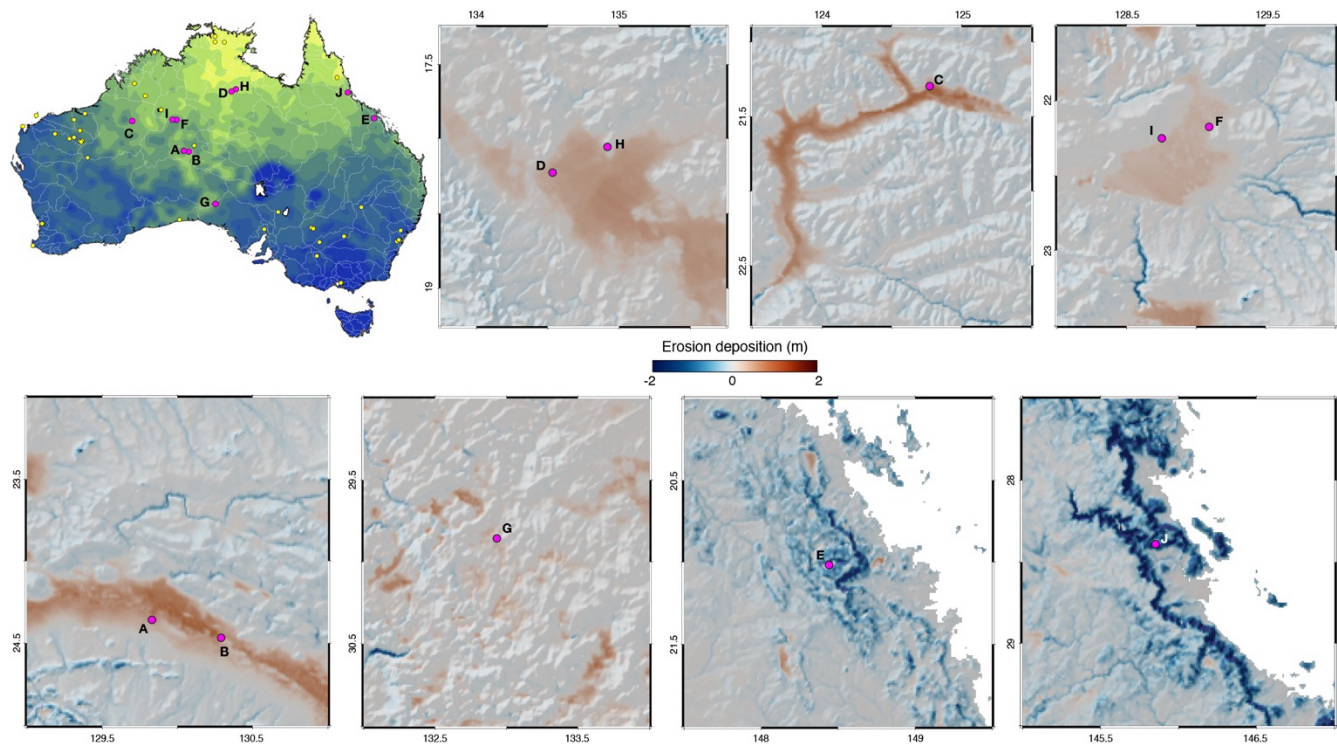

**Supplementary Figure 7. Regional morphological changes around identified sites with predicted archaeological potential.** Results from the landscape evolution model showing cumulative erosion deposition on  $2 \times 2^\circ$  tiles for sites A to J (Supplementary Tab. 4) based on the mechanistic movement realisations (Fig. 7). Top left map is produced with the open-source python interface for the Generic Mapping Tools (<https://www.pygmt.org>) and other panels are the results from goSPL software and are visualised with the open-source Paraview software (<https://www.paraview.org>).



| Longitude  | Latitude  | Site Name                               | Site ID | Reference                                                                                                                                                                                                              |
|------------|-----------|-----------------------------------------|---------|------------------------------------------------------------------------------------------------------------------------------------------------------------------------------------------------------------------------|
| 129.42     | -31.48    | Allen's Cave                            | 1       | Roberts et al. 1996                                                                                                                                                                                                    |
| 145.19     | -38       | Bend Road                               | 2       | Hewitt & Allen 2010                                                                                                                                                                                                    |
| 115.39     | -20.72    | Boodie Cave                             | 3       | Veth et al. 2017                                                                                                                                                                                                       |
| 142.85     | -35.23    | Box Gully (Lake Tyrell)                 | 4       | Richards et al. 2007                                                                                                                                                                                                   |
| 125        | -17.43    | Carpenter's Gap 1                       | 5       | O'Connor 1995; Langley et al. 2016; Maloney et al. 2018; McConnell & O'Connor 1997; Wallis 2001                                                                                                                        |
| 150.67     | -33.73    | Cranebrook Terrace                      | 6       | Nanson et al. 1987                                                                                                                                                                                                     |
| 147.2      | -30.2     | Cuddie Springs                          | 7       | Gillespie & Brook 2006; Grün et al. 2010                                                                                                                                                                               |
| 115.07     | -34.15    | Devils Lair                             | 8       | Dortch 1979a, 1979b; Dortch & Dortch 1996; Turney et al. 2001                                                                                                                                                          |
| 118.63     | -23.12    | Djadjiling                              | 9       | Morse 2009; Law et al. 2010                                                                                                                                                                                            |
| 119.0777   | -22.9845  | HD07-3A-PAD13                           | 10      | Cropper 2018a                                                                                                                                                                                                          |
| 119.083    | -22.9897  | HS-A1                                   | 11      | Cropper 2018b                                                                                                                                                                                                          |
| 147.03     | -8.56     | Ivane Valley                            | 12      | Summerhayes et al. 2010                                                                                                                                                                                                |
| 114.07     | -21.85    | Jansz                                   | 13      | Przywolnik 2002                                                                                                                                                                                                        |
| 117.2196   | -22.6276  | Juukan 2                                | 14      | Reynen 2018                                                                                                                                                                                                            |
| 119.671636 | -22.28119 | Kakutungutanta (CB10-93)                | 15      | Dias and Rapley 2014                                                                                                                                                                                                   |
| 120.41     | -25.08    | Karnatukul (Serpent's Glen Rockshelter) | 16      | McDonald et al. 2018                                                                                                                                                                                                   |
| 142.3      | -32.3     | Lake Menindee                           | 17      | Cupper and Duncan 2006                                                                                                                                                                                                 |
| 142.5      | -32.4     | Lake Tandou                             | 18      | Balme and Hope 1990                                                                                                                                                                                                    |
| 132.88     | -12.5     | Madjedbebe (Malakunanja II)             | 19      | Clarkson et al. 2017; Roberts et al. 1990; Roberts & Jones 1994                                                                                                                                                        |
| 126.96     | -14.2     | Minjiwarra                              | 20      | Veth et al. 2019                                                                                                                                                                                                       |
| 145.5      | -33.2     | Nombinnie                               | 21      | Bowler et al. 2012                                                                                                                                                                                                     |
| 132.89     | -13.06    | Nauwalabila 1                           | 22      | Roberts et al. 1990, 1993                                                                                                                                                                                              |
| 133.8      | -13.1     | Nawarla Gabarnmang                      | 23      | David et al. 2011, 2013, 2019                                                                                                                                                                                          |
| 119.87     | -23.32    | Newman Rock Shelter                     | 24      | Slack et al. 2018                                                                                                                                                                                                      |
| 144.8158   | -16.8034  | Ngarrabullgan Cave                      | 25      | Bird et al. 1999; David 1993                                                                                                                                                                                           |
| 137.7024   | -32.4751  | PACD H1                                 | 26      | Walshe 2012                                                                                                                                                                                                            |
| 119.66348  | -23.3908  | PAD10-17                                | 27      | Slack et al. 2018                                                                                                                                                                                                      |
| 127.61     | -20.14    | Parnkupirti                             | 28      | Veth et al. 2009                                                                                                                                                                                                       |
| 115.967249 | -31.93851 | Perth Airport: Adelaide Street          | 29      | Dortch & Dortch 2019                                                                                                                                                                                                   |
| 150.8569   | -33.583   | PT 12-A(2)                              | 30      | Williams et al. 2014                                                                                                                                                                                                   |
| 150.8718   | -33.57    | PT 12-B                                 | 31      | Williams et al. 2014                                                                                                                                                                                                   |
| 130.85     | -23.83    | Puritjarra                              | 32      | Smith 2010                                                                                                                                                                                                             |
| 119.78     | -23.45    | RH12-01                                 | 33      | Slack et al. 2018                                                                                                                                                                                                      |
| 126.06     | -18.69    | Riwi                                    | 34      | Balme 2000; Wood et al. 2016                                                                                                                                                                                           |
| 151.05     | -32.6     | Sandy Hollow                            | 35      | Hughes et al. 2014                                                                                                                                                                                                     |
| 115.96     | -31.89    | Upper Swan                              | 36      | Pearce & Barbetti 1981                                                                                                                                                                                                 |
| 139.06     | -30.69    | Warraty                                 | 37      | Hamm et al. 2016                                                                                                                                                                                                       |
| 120.15     | -20.53    | Watura Jurnti                           | 38      | Marsh et al. 2018                                                                                                                                                                                                      |
| 143.1      | -33.8     | Willandra Lakes/Mungo                   | 39      | Barbetti 1973; Bell 1991; Bowler et al. 2012; Bowler et al. 2003; Bowler and Price 1998; Clark 1987; Huxtable and Aitken 1977; Johnston & Clark 1998; McBryde 1980; Olley et al. 2006; Oyston 1996; Thorne et al. 1999 |
| 119.08     | -21.16    | Yurlu Kankala                           | 40      | Morse et al. 2014; Reynen et al. 2018                                                                                                                                                                                  |

**Supplementary Table 1. List of archaeological locations** (coordinates and names) with their corresponding references from Crabtree *et al.*<sup>4</sup> for 40 sites distributed across Sahul landmass with ages  $\geq 35,000$  years.

|                                                     | Category |        |       |      |       |      |    |
|-----------------------------------------------------|----------|--------|-------|------|-------|------|----|
|                                                     | 1        | 2      | 3     | 4    | 5     | 6    | 7  |
| <b>Slope</b> (degrees)                              | <0.125   | ≥0.125 | ≥0.25 | ≥0.5 | ≥0.75 | ≥1.5 | ≥3 |
| <b>Water flux</b><br>(Log-scale m <sup>3</sup> /yr) | <7       | ≥7     | ≥8    | ≥9   | ≥10   |      |    |

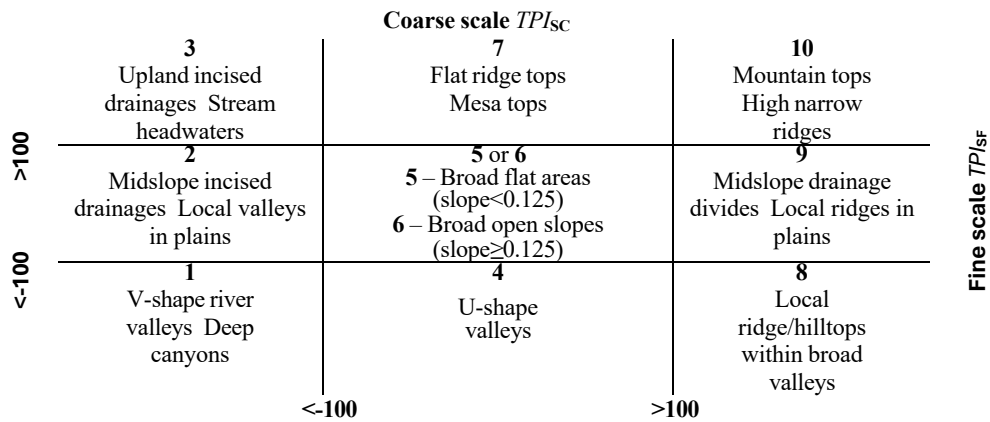

**Supplementary Table 2. Hierarchical classification values.** Top table shows the parametrization for the slope and water flux variables. Bottom table describe the classification of landforms<sup>10</sup> made by combining the two observation scales of the standardized topographic position index ( $TPI_{SF}|TPI_{SC}$  for fine and coarse respectively).

| Longitude  | Latitude  | Name                                    | Mean age   max   min  | Nb ages | Rating | Reference                                                                                           |
|------------|-----------|-----------------------------------------|-----------------------|---------|--------|-----------------------------------------------------------------------------------------------------|
| 129.42     | -31.48    | Allen's Cave                            | 39800   39800   39800 | 1       | A      | Roberts et al. 1996                                                                                 |
| 145.19     | -38       | Bend Road                               | 35300   35300   35300 | 1       | A      | Hewitt & Allen 2010                                                                                 |
| 115.39     | -20.72    | Boodie Cave                             | 45357   53900   35294 | 8       | A      | Veth et al. 2017                                                                                    |
| 142.85     | -35.23    | Box Gully (Lake Tyrell)                 | 40384   40384   40384 | 1       | B      | Richards et al. 2007                                                                                |
| 125        | -17.43    | Carpenter's Gap 1                       | 41156   43357   39220 | 10      | A      | O'Connor 1995; McConnell & O'Connor 1997; Wallis 2001; Langley et al. 2016; Maloney et al. 2018     |
| 150.67     | -33.73    | Cranebrook Terrace                      | 40323   47000   36700 | 11      | B/C    | Nanson et al. 1987                                                                                  |
| 147.2      | -30.2     | Cuddie Springs                          | 42470   51000   35400 | 12      | B      | Gillespie & Brook 2006; Grun et al. 2010                                                            |
| 115.07     | -34.15    | Devils Lair                             | 42557   48130   35160 | 14      | A/C    | Dortch 1979 / 1979a; Dortch & Dortch 1996; Turney et al. 2001                                       |
| 118.63     | -23.12    | Djadjiling                              | 35436   35753   35159 | 3       | A      | Morse 2009; Law et al. 2010                                                                         |
| 119.0777   | -22.9845  | HD07-3A-PAD13                           | 41550   47100   36000 | 2       | A      | Cropper 2018:181                                                                                    |
| 119.083    | -22.9897  | HS-A1                                   | 35396   35617   35175 | 2       | A      | Cropper 2018:220                                                                                    |
| 147.03     | -8.56     | Ivane Valley                            | 39360   41951   35049 | 7       | A      | Summerhayes et al. 2010                                                                             |
| 114.07     | -21.85    | Jansz                                   | 35230   35230   35230 | 1       | A      | Przywolnik 2002                                                                                     |
| 117.2196   | -22.6276  | Juukan 2                                | 39246   41100   38020 | 3       | A/B    | Reynen 2018:153                                                                                     |
| 119.671636 | -22.28119 | Kakutungutanta (CB10-93)                | 36039   36039   36039 | 1       | A      | Dias and Rapley 2014                                                                                |
| 120.41     | -25.08    | Karnatukul (Serpent's Glen Rockshelter) | 44104   47039   39345 | 3       | A      | McDonald et al. 2018                                                                                |
| 142.3      | -32.3     | Lake Menindee                           | 42315   43100   41530 | 2       | A      | Cupper and Duncan 2006                                                                              |
| 142.5      | -32.4     | Lake Tandou                             | 36000   36000   36000 | 1       | B      | Balme and Hope 1990                                                                                 |
| 132.88     | -12.5     | Madjedbebe (Malakunanja II)             | 53729   64900   36500 | 21      | A      | Roberts et al. 1990; Roberts & Jones 1994; Clarkson et al. 2017                                     |
| 126.96     | -14.2     | Minjiwarra                              | 43550   49300   37800 | 2       | A      | Veth et al. 2020                                                                                    |
| 145.5      | -33.2     | Mungo                                   | 37913   41740   35900 | 3       | B      | Bowler et al. 2012                                                                                  |
| 132.89     | -13.06    | Nauwalabila 1                           | 53400   53400   53400 | 1       | A      | Roberts et al. 1990 / 1993                                                                          |
| 133.8      | -13.1     | Nawarla Gabarnmang                      | 41183   45072   35091 | 36      | A      | David et al. 2019                                                                                   |
| 119.87     | -23.32    | Newman Rock Shelter                     | 35250   35250   35250 | 1       | A      | Slack et al. 2018                                                                                   |
| 144.8158   | -16.8034  | Ngarrabullgan Cave                      | 35386   35500   35200 | 3       | A      | Bird et al. 1999                                                                                    |
| 137.7024   | -32.4751  | PACD H1                                 | 41599   48100   36600 | 5       | A/B/C  | Walshe 2012                                                                                         |
| 119.66348  | -23.3908  | PAD10-17                                | 35450   35450   35450 | 1       | A      | Slack et al. 2018                                                                                   |
| 127.61     | -20.14    | Parnkupirti                             | 44866   52400   37200 | 3       | A      | Veth et al. 2009                                                                                    |
| 115.967249 | -31.93851 | Perth Airport: Adelaide Street          | 35000   35000   35000 | 1       | A      | Dortch & Dortch 2019                                                                                |
| 150.8569   | -33.583   | PT 12-A(2)                              | 36000   36000   36000 | 1       | A      | Williams et al. 2013                                                                                |
| 150.8718   | -33.57    | PT 12-B                                 | 36000   36000   36000 | 1       | A      | Williams et al. 2013                                                                                |
| 130.85     | -23.83    | Puritjarra                              | 41966   46000   35100 | 3       | B/C    | Smith et al. 1997; Smith 2010                                                                       |
| 119.78     | -23.45    | RH12-01                                 | 42020   42020   42020 | 1       | A      | Slack et al. 2018                                                                                   |
| 126.06     | -18.69    | Riwi                                    | 42023   48800   35300 | 37      | A      | Wood et al. 2016                                                                                    |
| 151.05     | -32.6     | Sandy Hollow                            | 52900   52900   52900 | 1       | B      | Hughes et al. 2014                                                                                  |
| 115.96     | -31.89    | Upper Swan                              | 37233   39500   35100 | 3       | A      | Pearce & Barbetti 1981                                                                              |
| 139.06     | -30.69    | Warraty                                 | 41352   44400   35260 | 5       | A      | Hamm et al. 2016                                                                                    |
| 120.15     | -20.53    | Watura Jurnti                           | 39217   39677   38772 | 3       | A      | Marsh et al. 2018                                                                                   |
| 143.1      | -33.8     | Willandra Lakes                         | 43509   59000   35300 | 42      | A      | Bowler and Price 1998; Bowler et al. 2003; Huxtable and Aitken 1977; Oyston 1996; Olley et al. 2006 |
| 119.08     | -21.16    | Yurlu Kankala                           | 40339   40752   39819 | 4       | A      | Morse et al. 2014; Reynen et al. 2018                                                               |

**Supplementary Table 3.** Archaeological locations (coordinates and names) as in Supplementary Tab. 1 with their corresponding age range, quality rating and sources from Crabtree *et al.*<sup>4</sup>.

| Longitude | Latitude | Site ID | Regional context                                                                                                                  |
|-----------|----------|---------|-----------------------------------------------------------------------------------------------------------------------------------|
| 130.30    | -24.46   | A       | SE of Puritjarra (site 32 in Extended Data Tab. 1) on the edges of Lake Neale (Central Australia)                                 |
| 129.83    | -24.36   | B       | SE of Puritjarra (site 32 in Extended Data Tab. 1) on the edges of Lake Neale (Central Australia)                                 |
| 124.78    | -21.3    | C       | Along the banks of the Nullagine River in the Pilbara region (Western Australia)                                                  |
| 134.93    | -18.05   | D       | Wetlands on the western side of Tarrabool Lake connecting drainage from Beetaloo Basin and Barkly Tablelands (Northern Territory) |
| 148.45    | -21.02   | E       | At the bottom of the Massey Creek incised valley in the Atherton Tablelands (Queensland)                                          |
| 129.1     | -22.17   | F       | Northern end of Lake Mackay (Western Desert region) on the Northern Territory side of the lake                                    |
| 132.93    | -29.86   | G       | South of Tallaringa Conservation Park on the fringe of the Great Victoria Desert (South Australia)                                |
| 134.53    | -18.22   | H       | Wetlands on the western side of Tarrabool Lake connecting drainage from Beetaloo Basin and Barkly Tablelands (Northern Territory) |
| 128.75    | -22.25   | I       | Northern end of Lake Mackay (Western Desert region) on the Northern Territory side of the lake                                    |
| 145.85    | -18.38   | J       | Lower Herbert River near Lumholtz in the Atherton Tablelands (Cassowary Coast Region, Queensland)                                 |

**Supplementary Table 4.** Coordinates and regional morphological context of predicted sites with archaeological potentials based on the mechanistic movement realisations (Fig. 7 and Supplementary Fig. 7).

## Supplementary References

1. Bradshaw, C. *et al.* Minimum founding populations for the first peopling of Sahul. *Nat. Ecol. & Evol.* **3**, DOI: 10.1038/s41559-019-0902-6 (2019).
2. Claussen, M. *et al.* Earth system models of intermediate complexity: Closing the gap in the spectrum of climate system models. *Clim. Dyn.* **18**, 579–586, DOI: 10.1007/s00382-001-0200-1 (2002).
3. Lambeck, K. & Chappell, J. Sea level change through the last glacial cycle. *Science* **292**, 679–686, DOI: 10.1126/science.1059549 (2001).
4. Crabtree, S. *et al.* Landscape rules predict optimal superhighways for the first peopling of Sahul. *Nat. Hum. Behav.* **5**, DOI: 10.1038/s41562-021-01106-8 (2021).
5. Quaglietta, L. & Porto, M. SiMRiv: An R package for mechanistic simulation of individual, spatially-explicit multistate movements in rivers, heterogeneous and homogeneous spaces incorporating landscape bias. *Movement Ecology* DOI:10.1186/s40462-019-0154-8 (2019).
6. Kealy, S., Louys, J. & O’Connor, S. Least-cost pathway models indicate northern human dispersal from Sunda to Sahul. *Journal of Human Evolution* **125**, 59–70, DOI: 10.1016/j.jhevol.2018.10.003 (2018).
7. Kealy, S., Louys, J. & O’Connor, S. Islands under the sea: A review of early modern human dispersal routes and migration hypotheses through wallacea. *The J. Island Coast. Archaeol.* **11**, 364–384, DOI: 10.1080/15564894.2015.1119218 (2016).
8. Bird, M. *et al.* Early human settlement of Sahul was not an accident. *Sci. Reports* **9**, 8220, DOI: 10.1038/s41598-019-42946-9 (2019).
9. Bradshaw, C. J. *et al.* Directionally supervised cellular automaton for the initial peopling of Sahul. *Quat. Sci. Rev.* **303**, 107971, DOI: 10.1016/j.quascirev.2023.107971 (2023).
10. Weiss, A. Topographic position and landforms analysis. In *ESRI Users Conference, San Diego, CA.* (2001).
